# Supplementary material for: Effects of the Staphylococcus aureus and Staphylococcus epidermidis Secretomes Isolated from the Skin Microbiota of Atopic Children on CD4+ T Cell Activation
Source: PubMed Central journal article supplement (PMC4624846; doi:10.1371/journal.pone.0141067), 2015-10-28
Supplement: pone.0141067.s001.pdf [file pone.0141067.s001.pdf]

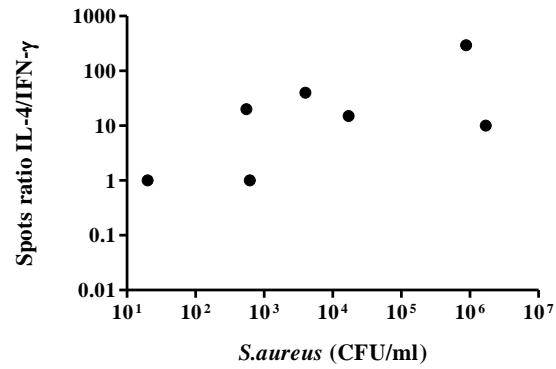

**Figure S1. IFN- $\gamma$  and IL-4 ELISpot assays.** Spot forming units/ $10^6$  T cells from the peripheral blood of AD and non-AD children in response to crude extract (CE) of Der p were quantified. In AD patients (N=17), counts (CFU/ml) of skin *S. aureus* were associated with the IL4 to IFN- $\gamma$  spots ratio. Spearman's correlation,  $r=0.63$ ,  $p=0.0062$ .
