# Supplementary material for: Effects of the Staphylococcus aureus and Staphylococcus epidermidis Secretomes Isolated from the Skin Microbiota of Atopic Children on CD4+ T Cell Activation
Source: PubMed Central journal article supplement (PMC4624846; doi:10.1371/journal.pone.0141067), 2015-10-28
Supplement: pone.0141067.s002.pdf [file pone.0141067.s002.pdf]

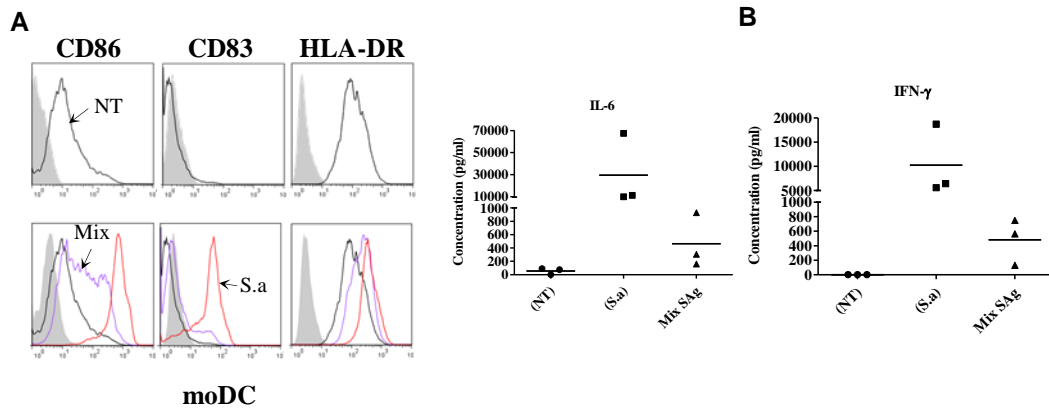

**Figure S2. Activation profile of moDC exposed to a mixture of recombinant *S. aureus* toxins.** (A) Activation phenotype (CD86, CD83 and HLA-DR levels) of moDC exposed to medium (NT), *S. aureus* secretome (S.a) or a mixture of recombinant *S. aureus* toxins SEC, SEG, SEI, SEIM, SEIN and SEIO (Mix) at 100 ng/ml each for 24 hours. (B) Quantification (pg/ml) of IL-6 and IFN- $\gamma$  secreted by cells in (A). N=3 independent experiments.
