# Supplementary material for: Effects of the Staphylococcus aureus and Staphylococcus epidermidis Secretomes Isolated from the Skin Microbiota of Atopic Children on CD4+ T Cell Activation
Source: PubMed Central journal article supplement (PMC4624846; doi:10.1371/journal.pone.0141067), 2015-10-28
Supplement: pone.0141067.s006.pdf [file pone.0141067.s006.pdf]

## S2 File. Supplementary References

1. Bianchi P, Ribet V, Casas C, Lejeune O, Schmitt AM, Redoules D. Analysis of gene expression in atopic dermatitis using a microabrasive method. *The Journal of investigative dermatology*. 2012;132(2):469-72.
2. Omoe K, Hu DL, Ono HK, Shimizu S, Takahashi-Omoe H, Nakane A, et al. Emetic potentials of newly identified staphylococcal enterotoxin-like toxins. *Infection and immunity*. 2013;81(10):3627-31.
3. Hu DL, Omoe K, Shimoda Y, Nakane A, Shinagawa K. Induction of emetic response to staphylococcal enterotoxins in the house musk shrew (*Suncus murinus*). *Infection and immunity*. 2003;71(1):567-70.
4. Omoe K, Ishikawa M, Shimoda Y, Hu DL, Ueda S, Shinagawa K. Detection of seg, seh, and sei genes in *Staphylococcus aureus* isolates and determination of the enterotoxin productivities of *S. aureus* isolates Harboring seg, seh, or sei genes. *Journal of clinical microbiology*. 2002;40(3):857-62.
5. Monecke S, Luedicke C, Slickers P, Ehricht R. Molecular epidemiology of *Staphylococcus aureus* in asymptomatic carriers. *European journal of clinical microbiology & infectious diseases* : official publication of the European Society of Clinical Microbiology. 2009;28(9):1159-65.
6. Thomas D, Dauwalder O, Brun V, Badiou C, Ferry T, Etienne J, et al. *Staphylococcus aureus* superantigens elicit redundant and extensive human Vbeta patterns. *Infection and immunity*. 2009;77(5):2043-50.
