# Supplementary material for: Effects of the Staphylococcus aureus and Staphylococcus epidermidis Secretomes Isolated from the Skin Microbiota of Atopic Children on CD4+ T Cell Activation
Source: PubMed Central journal article supplement (PMC4624846; doi:10.1371/journal.pone.0141067), 2015-10-28
Supplement: pone.0141067.s007.pdf [file pone.0141067.s007.pdf]

**S1 Table. Transcriptome analysis of gene expressed in inflamed areas of AD patients relative to their non-AD counterparts.**

| Gene       | p value | FC          |
|------------|---------|-------------|
| <b>FLG</b> | <.0001  | -33,4620368 |
| <b>LOR</b> | <.0001  | -37,8871287 |

|                              |        |             |
|------------------------------|--------|-------------|
| <b>S100A7</b>                | 0.0018 | 6,69256792  |
| <b>S100A8</b>                | 0.0002 | 28,2174085  |
| <b>S100A9</b>                | 0.0002 | 21,1013902  |
| <b>NLRP3</b>                 | 0.0003 | 280,416897  |
| <b>CASP1</b>                 | 0.0612 | -6,59843344 |
| <b>IL1<math>\beta</math></b> | 0.0412 | 10,8693377  |

|               |        |             |
|---------------|--------|-------------|
| <b>LL37</b>   | 0.0044 | 119,54566   |
| <b>HBD2</b>   | 0.0037 | 6,6670778   |
| <b>HBD3</b>   | 0.0029 | 11,8114083  |
| <b>RNASE7</b> | 0.0008 | -6,07797538 |

|              |        |            |
|--------------|--------|------------|
| <b>CCL3</b>  | 0.0306 | 12,5081269 |
| <b>CCL17</b> | 0.0181 | 10,2317651 |
| <b>IL-8</b>  | 0.0009 | 32,1584301 |
| <b>IL-13</b> | 0.0009 | 643,855732 |
| <b>IL-22</b> | 0.0019 | 693,153442 |

Skin samples were taken by scratching the skin surface and reverse-transcribed RNA submitted to PCR with primers for genes as indicated. Results are expressed as Fold Change (FC) in AD (N=21) vs non-AD samples (N=14). Associated p values are shown according to methods described in statistical section.
